# Supplementary material
Source: HighWire-hosted journal article supplement (https://erj.ersjournals.com/content/54/5/1900673)
Supplement: inline-supplementary-material-2 [file inline-supplementary-material-2.pdf]

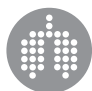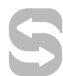

SHAREABLE PDF

# Efficacy and safety of inhaled $\alpha$ 1-antitrypsin in patients with severe $\alpha$ 1-antitrypsin deficiency and frequent exacerbations of COPD

Jan Stolk<sup>1</sup>, Naveh Tov<sup>2</sup>, Kenneth R. Chapman<sup>3</sup>, Pablo Fernandez<sup>4</sup>, William MacNee<sup>5</sup>, Nicholas S. Hopkinson<sup>6</sup>, Eeva Piitulainen<sup>7</sup>, Niels Seersholm<sup>8</sup>, Claus F. Vogelmeier<sup>9</sup>, Robert Bals<sup>10</sup>, Gerry McElvaney<sup>11</sup> and Robert A. Stockley<sup>12</sup>

**Affiliations:** <sup>1</sup>Dept of Pulmonology, Member of European Reference Network LUNG, Leiden University Medical Centre, Leiden, NL. <sup>2</sup>Dept of Clinical Development, Kamada Ltd, Rehovot, Israel. <sup>3</sup>Dept of Medicine, University of Toronto, Toronto, ON, Canada. <sup>4</sup>Independent Consultant, Penn, UK. <sup>5</sup>University of Edinburgh, Edinburgh, UK. <sup>6</sup>National Heart and Lung Institute, Imperial College London, London, UK. <sup>7</sup>Dept of Respiratory Medicine and Allergology, Malmö, Skane University Hospital, Lund University, Lund, Sweden. <sup>8</sup>Dept of Respiratory Medicine Y, Gentofte University Hospital, Copenhagen, Denmark. <sup>9</sup>Dept of Medicine, Pulmonary and Critical Care Medicine, Member of the German Center for Lung Diseases (DZL), University Medical Centre Giessen and Marburg, Philipps-University Marburg, Marburg, Germany. <sup>10</sup>Internal Medicine V - Pulmonology, Member of the German Center for Lung Diseases (DZL), Hospital of the University of the Saarland, Homburg, Germany. <sup>11</sup>Dept of Respiratory Medicine, Beaumont Hospital, Royal College of Surgeons in Ireland, Dublin, Ireland. <sup>12</sup>Queen Elizabeth Hospital, Birmingham, UK.

**Correspondence:** Jan Stolk, Dept of Pulmonology, Member of European Reference Network LUNG, Leiden University Medical Centre, Leiden, The Netherlands. E-mail: j.stolk@lumc.nl

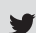

@ERSpublications

**Inhaled  $\alpha$ 1-antitrypsin did not significantly reduce the time to first exacerbation in patients with severe  $\alpha$ 1-antitrypsin deficiency who experience frequent exacerbations of COPD in a randomised placebo-controlled clinical trial of 1 year** <http://bit.ly/2P5zXdK>

**Cite this article as:** Stolk J, Tov N, Chapman KR, *et al.* Efficacy and safety of inhaled  $\alpha$ 1-antitrypsin in patients with severe  $\alpha$ 1-antitrypsin deficiency and frequent exacerbations of COPD. *Eur Respir J* 2019; 54: 1900673 [https://doi.org/10.1183/13993003.00673-2019].

This single-page version can be shared freely online.

**ABSTRACT** Patients with inherited  $\alpha$ 1-antitrypsin (AAT) deficiency (ZZ-AATD) and severe chronic obstructive pulmonary disease (COPD) frequently experience exacerbations. We postulated that inhalation of nebulised AAT would be an effective treatment.

We randomly assigned 168 patients to receive twice-daily inhalations of 80 mg AAT solution or placebo for 50 weeks. Patients used an electronic diary to capture exacerbations. The primary endpoint was time from randomisation to the first event-based exacerbation. Secondary endpoints included change in the nature of the exacerbation as defined by the Anthonisen criteria. Safety was also assessed.

Time to first moderate or severe exacerbation was a median of 112 days (interquartile range (IQR) 40–211 days) for AAT and 140 days (IQR 72–142 days) for placebo ( $p=0.0952$ ). The mean yearly rate of all exacerbations was 3.12 in the AAT-treated group and 2.67 in the placebo group ( $p=0.31$ ). More patients receiving AAT reported treatment-related treatment-emergent adverse events compared to placebo (57.5% *versus* 46.9%, respectively) and they were more likely to withdraw from the study. After the first year of the study, when modifications to the handling of the nebuliser were introduced, the rate of safety events in the AAT-treated group dropped to that of the placebo group.

We conclude that in AATD patients with severe COPD and frequent exacerbations, AAT inhalation for 50 weeks showed no effect on time to first exacerbation but may have changed the pattern of the episodes.
